# Supplementary material
Source: bioRxiv or medRxiv preprint supplement (https://www.biorxiv.org/highwire/filestream/27190/field_highwire_adjunct_files/12/094060-4.pdf)
Supplement: Supplementary file [file 094060-4.pdf]

106 samples

Tree 1

Tree 2

Tree 3

Tree 4

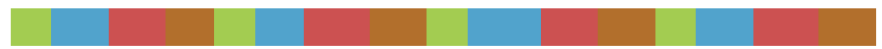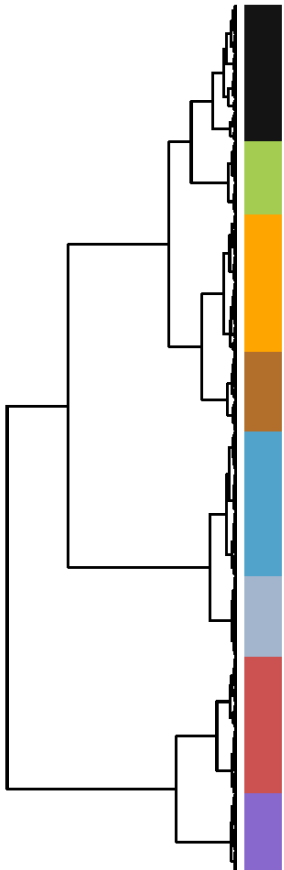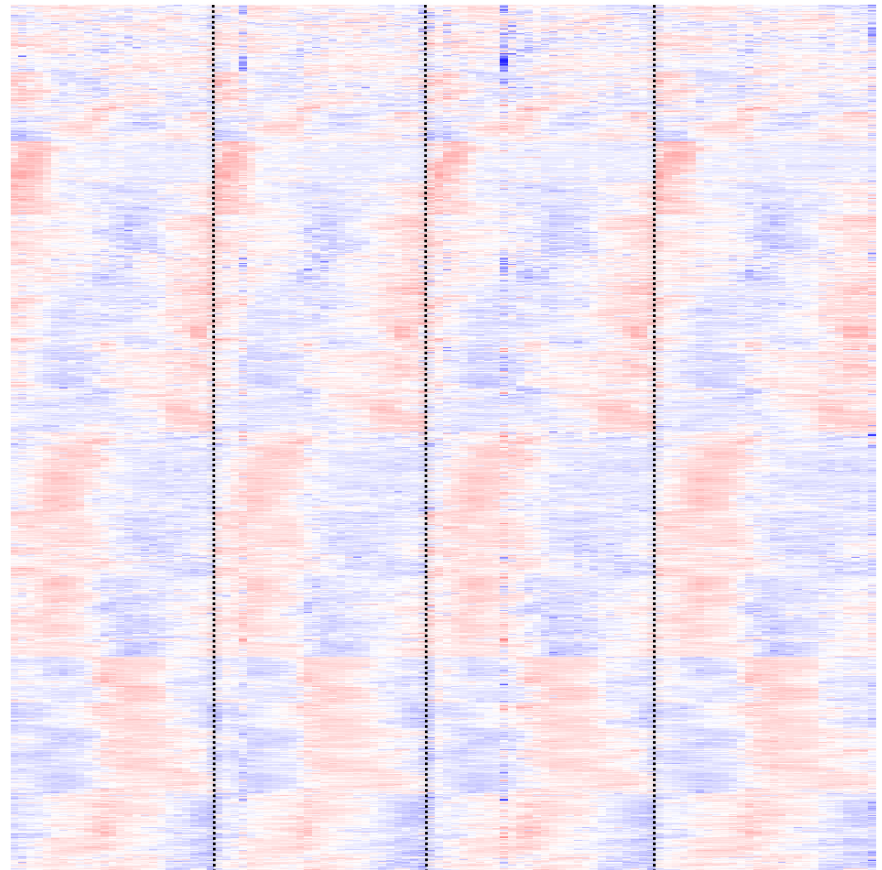

28,294 genes
